# Supplementary material for: Detection of electrolyte leakage from lithium-ion batteries using a miniaturized sensor based on functionalized double-walled carbon nanotubes
Source: Royal Society of Chemistry journal article supplement (doi:10.1039/d1tc01069g), 2021-01-01
Supplement: d1tc01069g1.pdf [file d1tc01069g1.pdf]

**Electronic Supplementary Material (ESI) for ChemComm.**

**This journal is © The Royal Society of Chemistry 2018**

## **Supporting Information**

*For*

### **Detection of Electrolyte Leakage from Lithium-Ion Batteries Using Miniaturized Sensor Based on Functionalized Double-Walled Carbon Nanotubes**

*Xiaowen Du<sup>a#</sup>, Ben Yang<sup>a#</sup>, Yang Lu<sup>a</sup>, Xiaojun Guo<sup>b\*</sup>, Guoqing Zu<sup>a\*</sup> and Jia Huang<sup>a</sup>*

*\**

*<sup>a</sup> Interdisciplinary Materials Research Center, School of Materials Science and  
Engineering, Shanghai Institute of Intelligent Science and Technology, Tongji  
University, Shanghai, 201804, China.*

*<sup>b</sup> Department of Electronic Engineering, School of Electronic Information and  
Electrical Engineering, Shanghai Jiao Tong University, Shanghai 200240, China*

*# These authors contributed equally to this work*

Corresponding Author

\*(J. H.). E-mail: [huangjia@tongji.edu.cn](mailto:huangjia@tongji.edu.cn); [guoqingzu@tongji.edu.cn](mailto:guoqingzu@tongji.edu.cn); [x.guo@sjtu.edu.cn](mailto:x.guo@sjtu.edu.cn)

## Table of content:

1. XPS spectra of f-DWCNTs and DWCNTs.
2. The SEM image of f-DWCNTs film.
3. TEM images of f-DWCNTs and DWCNTs.
4. The stability of the sensor when detecting DMC.
5. Response rate of the sensor detecting LIBs' electrolyte and CO<sub>2</sub>.
6. The normalized output current of the sensor after electrolyte leakage.

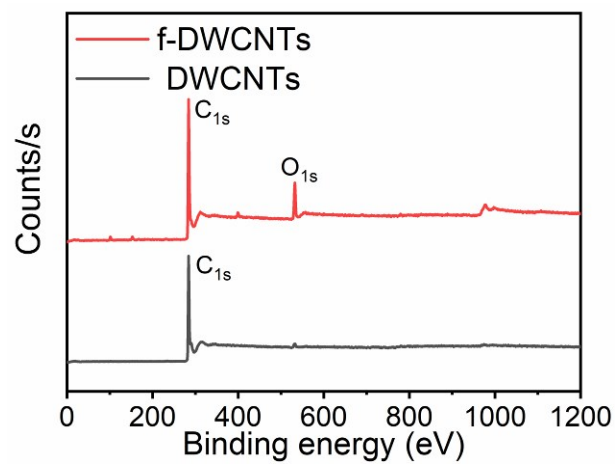

**Figure S1.** XPS spectra of f-DWCNTs and DWCNTs.

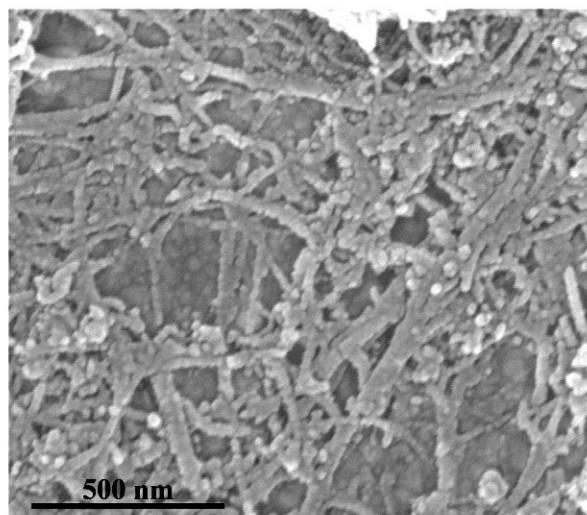

**Figure S2.** The SEM image of f-DWCNTs film.

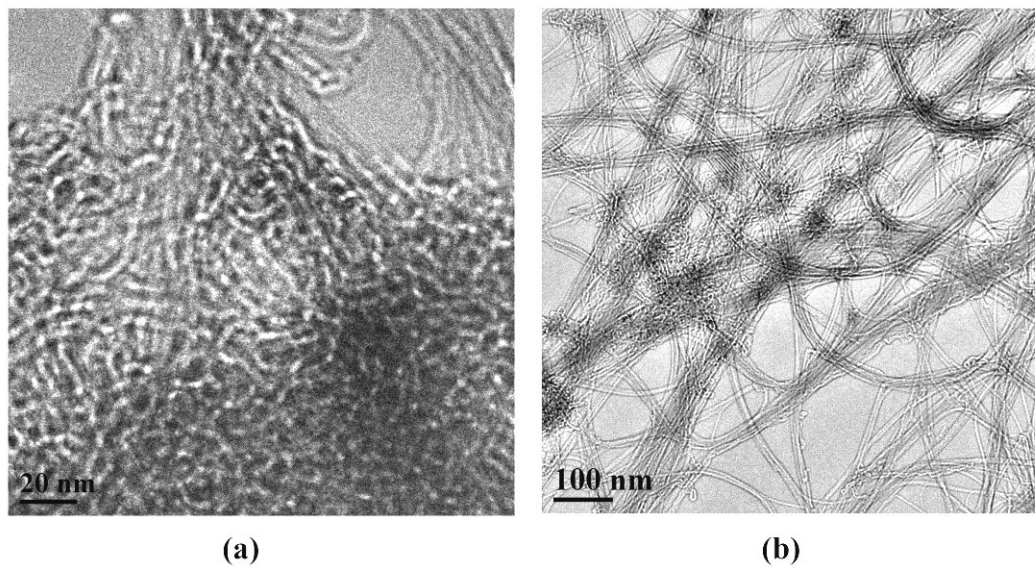

**Figure S3.** TEM images of (a) f-DWCNTs and (b) DWCNTs.

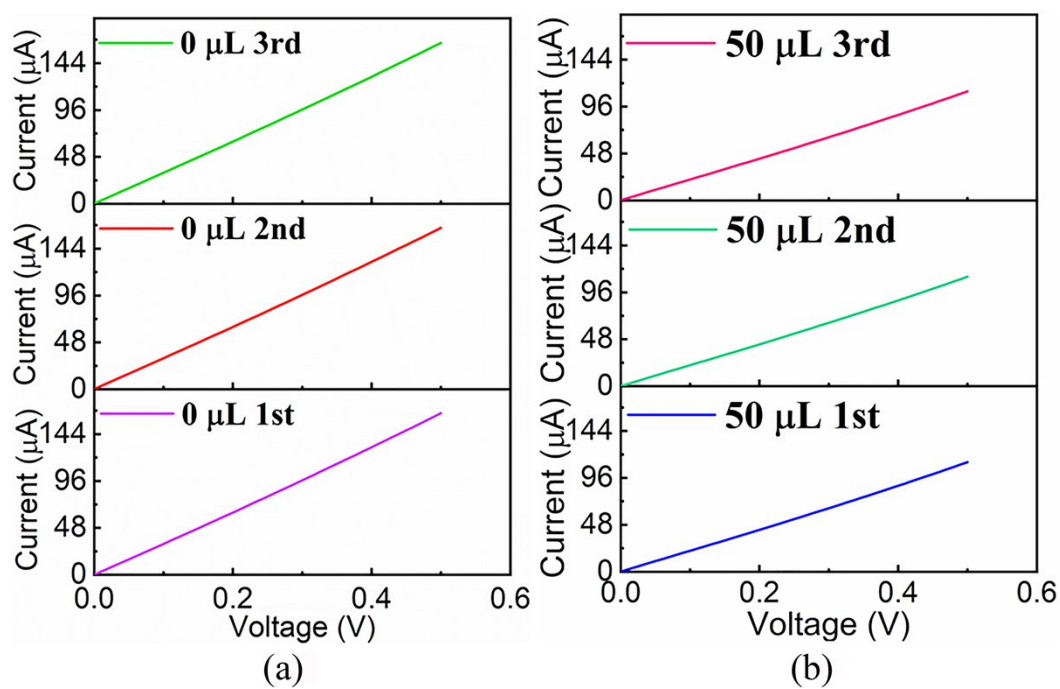

**Figure S4.** I-V curves of the sensor based on f-DWCNTs detecting (a) 0  $\mu\text{L}$  and (b) 50  $\mu\text{L}$  DMC for 3 times continuously.

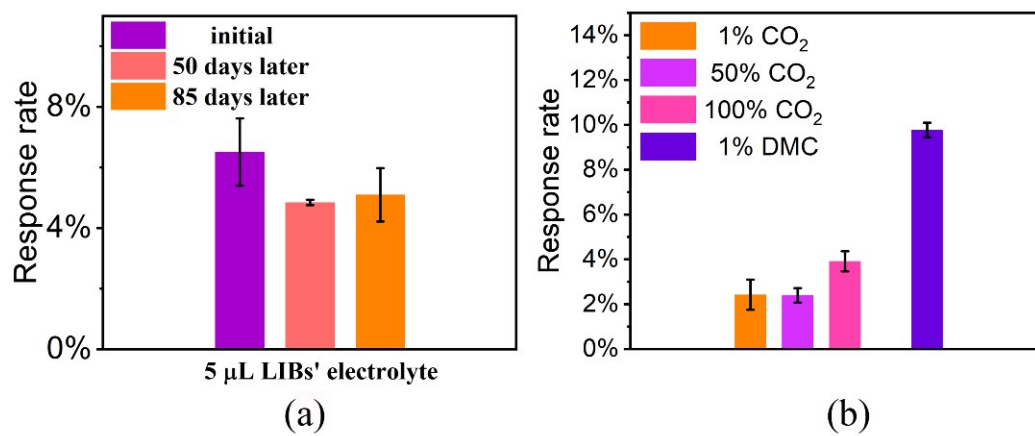

**Figure S5.** (a) Response rate of the sensor detecting 5  $\mu\text{L}$  LIBs' electrolyte when put in ambient condition for 50 days and 85 days. (b) Response rate of the sensor when put in CO<sub>2</sub> and DMC vapour.

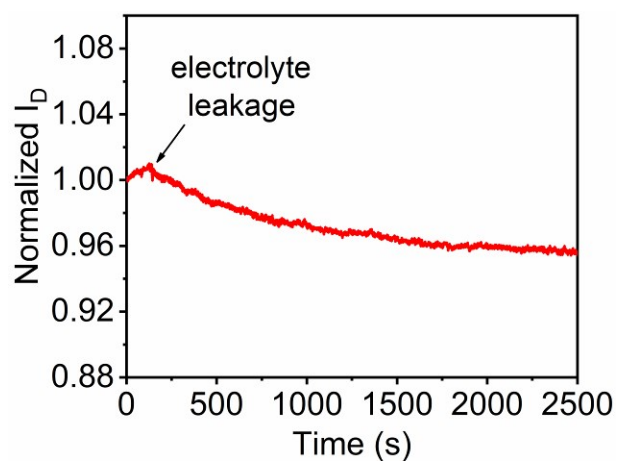

**Figure S6.** The normalized output current of the sensor after electrolyte leakage.
